# Supplementary material for: Pt nanoparticles supported on YCoxFe1−xO3 perovskite oxides: highly efficient catalysts for liquid-phase hydrogenation of cinnamaldehyde
Source: Royal Society of Chemistry journal article supplement (doi:10.1039/c9cc00318e), 2019-01-01
Supplement: c9cc00318e1.pdf [file c9cc00318e1.pdf]

## Supporting Information

### **Pt nanoparticles supported on $\text{YCo}_x\text{Fe}_{1-x}\text{O}_3$ perovskite oxides: Highly efficient catalysts for liquid-phase hydrogenation of cinnamaldehyde**

Yujie Xue,<sup>a</sup> Huiyue Xin,<sup>a</sup> Wenhui Xie,<sup>b</sup> Peng Wu<sup>a</sup> and Xiaohong Li,<sup>a,\*</sup>

<sup>a</sup> *Shanghai Key Laboratory of Green Chemistry and Chemical Processes, School of Chemistry and Molecular Engineering, East China Normal University, 3663 North Zhongshan Rd., Shanghai 200062, China. E-mail: xhli@chem.ecnu.edu.cn*

<sup>b</sup> *School of Physics and Materials, East China Normal University, 3663 North Zhongshan Rd., Shanghai 200062, China*

# Contents

## Experimental

|                                                                                                                                                                                                                                                                             |    |
|-----------------------------------------------------------------------------------------------------------------------------------------------------------------------------------------------------------------------------------------------------------------------------|----|
| 1. Preparation of Pt/YCo <sub>x</sub> Fe <sub>1-x</sub> O <sub>3</sub> catalyst .....                                                                                                                                                                                       | 3  |
| 2. Characterization .....                                                                                                                                                                                                                                                   | 4  |
| 3. Catalytic test.....                                                                                                                                                                                                                                                      | 5  |
| <b>Fig. S1</b> Wide-angle XRD patterns of the Pt-based catalysts and YCo <sub>x</sub> Fe <sub>1-x</sub> O <sub>3</sub> supports.....                                                                                                                                        | 6  |
| <b>Fig. S2.</b> N <sub>2</sub> -physisorption isotherms of Pt/YCo <sub>x</sub> Fe <sub>1-x</sub> O <sub>3</sub> catalysts .....                                                                                                                                             | 7  |
| <b>Fig. S3.</b> SEM images of (a, b) YCoO <sub>3</sub> ; (c, d) YCo <sub>0.3</sub> Fe <sub>0.7</sub> O <sub>3</sub> ; (e, f) Pt/YCo <sub>0.3</sub> Fe <sub>0.7</sub> O <sub>3</sub> -fresh and<br>(g, h) Pt/YCo <sub>0.3</sub> Fe <sub>0.7</sub> O <sub>3</sub> -used ..... | 8  |
| <b>Fig. S4.</b> The correlation of Mass Specific Rate versus the molar ratio of Co/Fe .....                                                                                                                                                                                 | 9  |
| <b>Fig. S5.</b> TEM images and Pt particle size distribution of the used Pt/YCo <sub>0.3</sub> Fe <sub>0.7</sub> O <sub>3</sub><br>catalyst.....                                                                                                                            | 10 |
| <b>Fig. S6.</b> TG curve of the used Pt/YCo <sub>0.3</sub> Fe <sub>0.7</sub> O <sub>3</sub> catalyst .....                                                                                                                                                                  | 11 |
| <b>Table S1.</b> Comparison of the Pt-based catalysts for the selective hydrogenation of CAL to yield<br>COL. ....                                                                                                                                                          | 12 |
| <b>Fig. S7.</b> HAADF-STEM images and STEM-EDS elemental mapping images for the area<br>enclosed by the orange square for Pt/YCoO <sub>3</sub> ; Pt/YFeO <sub>3</sub> and Pt/YCo <sub>0.3</sub> Fe <sub>0.7</sub> O <sub>3</sub> . ....                                     | 13 |
| <b>Fig. S8.</b> XPS spectra of the Pt/YCo <sub>x</sub> Fe <sub>1-x</sub> O <sub>3</sub> catalyst.....                                                                                                                                                                       | 15 |
| <b>Fig. S9.</b> The correlation of COL selectivity versus Pt <sup>0</sup> amount on the Pt/YCo <sub>x</sub> Fe <sub>1-x</sub> O <sub>3</sub> catalyst<br>according to XPS result .....                                                                                      | 16 |

## Experimental

### 1. Preparation of Pt/YCo<sub>x</sub>Fe<sub>1-x</sub>O<sub>3</sub> catalyst

SBA-15 was synthesized using the triblock copolymer Pluronic 123 and tetraethyl orthosilicate (TEOS) according to Ref. [1]. YCo<sub>x</sub>Fe<sub>1-x</sub>O<sub>3</sub> perovskite-type composites were prepared by a modified sol-gel method [2]. The starting materials Y(NO<sub>3</sub>)<sub>3</sub>·6H<sub>2</sub>O, Co(NO<sub>3</sub>)<sub>2</sub>·6H<sub>2</sub>O, and Fe(NO<sub>3</sub>)<sub>3</sub>·9H<sub>2</sub>O were dissolved in distilled water with a stoichiometric ratio of Y/Co/Fe=1/1/0, 1/0.7/0.3, 1/0.5/0.5, 1/0.3/0.7; 1/0/1, respectively. Citric acid was added to the above nitrate solution as a complexing agent to control the final citrate/transition metal ratio of 1/1. Then, SBA-15 (1.0 g) after sonicated in 10 mL deionized water was introduced to the above mixture. Subsequently, the solution was stirred for 3-4 h at room temperature. Next, the mixed solution was moved to a water bath at 90 °C until the sticky gel was formed. After that, the gel was dried at 140 °C overnight. After grinding, the precursor was calcined at 500 °C with a ramping rate of 5 °C/min and kept at 500 °C for 4 h, followed by further calcination at 950 °C with a ramping rate of 3.5 °C/min and remained at 950 °C for 5 h. Finally, the resultant powders were treated with sodium hydroxide solution (2 mol/L) to remove the SBA-15 template.

The nominal 5 wt% Pt catalysts were prepared via an impregnation method using an aqueous solution of H<sub>2</sub>PtCl<sub>6</sub>. The suspension was stirred for 4-6 h at room temperature and then evaporated to remove the excess solvent, followed by drying overnight at 100 °C. Finally, catalyst precursors were reduced in an aqueous solution of sodium formate at 90 °C after calcined in air at 200 °C for 2 h.

### References

- [1] D. Zhao, J. Feng, Q. Huo, N. Melosh, G. H. Fredrickson, B. F. Chmelka, G. D. Stucky, *Science*, 1998, 279, 548-552.
- [2] Y. Wei, H. Gui, Z. Zhao, J. Li, Y. Liu, S. Xin, X. Li, W. Xie, *AIP Adv.*, 2014, **4**, ID: 127134.

## 2. Characterization

Powder X-ray diffraction (XRD) patterns of the samples were collected on a Bruker D8 ADVANCE instrument using Cu K $\alpha$  radiation ( $\lambda=1.54178$  Å) as X-ray source. The N<sub>2</sub>-physisorption isotherms of samples were measured at 77 K on a Quantachrome Autosorb-3B system after the samples were evacuated at 300 °C for 4 h. The Brunauer-Emmett-Teller (BET) specific surface area was calculated using adsorption data in the relative pressure range from 0.05 to 0.35. Scanning electron microscopy (SEM) was performed using a Hitachi S-4800 microscope. The transmission electron microscopy (TEM) images were taken on an FEI Tecnai G2-TF30 microscope at an acceleration voltage of 300 kV. The actual Pt loading of samples was determined by Thermo Elemental IRIS Intrepid II XSP inductively coupled plasma-optical emission spectroscopy (ICP-OES). The thermogravimetric (TG) analysis of the samples was conducted from r.t. to 800 °C under an air atmosphere with Mettler Toledo TGA/SDTA851<sup>e</sup> apparatus.

X-ray photoelectron spectrum (XPS) of the samples were measured with a Thermo Fisher Scientific ESCALAB 250Xi spectrometer with Al K $\alpha$  radiation (1486.6 eV) as incident beam with a monochromator. The samples were directly measured only after pretreatment under vacuum. The binding energy (BE) was calibrated using C-C binding energy at 284.4 eV in order to compare the BEs with the data from the literature. The spectra shown in the figures have been corrected by subtraction of a Shirley background. Spectral fitting and peak integration was done using the XPSPEAK software.

Temperature-programmed reduction with hydrogen (H<sub>2</sub>-TPR) was conducted to understand the interaction between Pt and support with a Micromeritics AutoChem II Chemisorption Analyzer. Prior to H<sub>2</sub>-TPR experiments, the samples were pretreated in flowing Ar at 300 °C for 1 h and then cooled to room temperature in flowing Ar (99.999%, 50 mL/min).

After that, the sample was heated from room temperature to 800 °C with a heating rate of 10 °C/min under a mixture of 10% H<sub>2</sub>-Ar (50 mL/min). The rate of H<sub>2</sub> consumption was monitored by a gas chromatograph (GC) with a thermal conductivity detector (TCD).

### **3. Catalytic tests**

A certain amount of catalyst was pretreated under hydrogen atmosphere (99.999%, 30 mL/min) at 200 °C for 2 h before use. The catalyst was then mixed with solvent and CAL without further exposure to air, which was subsequently transferred to a 100-mL autoclave. The hydrogenation reaction began with stirring (1000 rpm) at a designated temperature after hydrogen (2.0 MPa) was introduced into the autoclave. The reaction was stopped after a proper time, and then the products were analyzed by GC-FID (GC-2014, Shimadzu Co.) equipped with a capillary column (DM-WAX, 30 m × 0.25 mm × 0.25 μm).

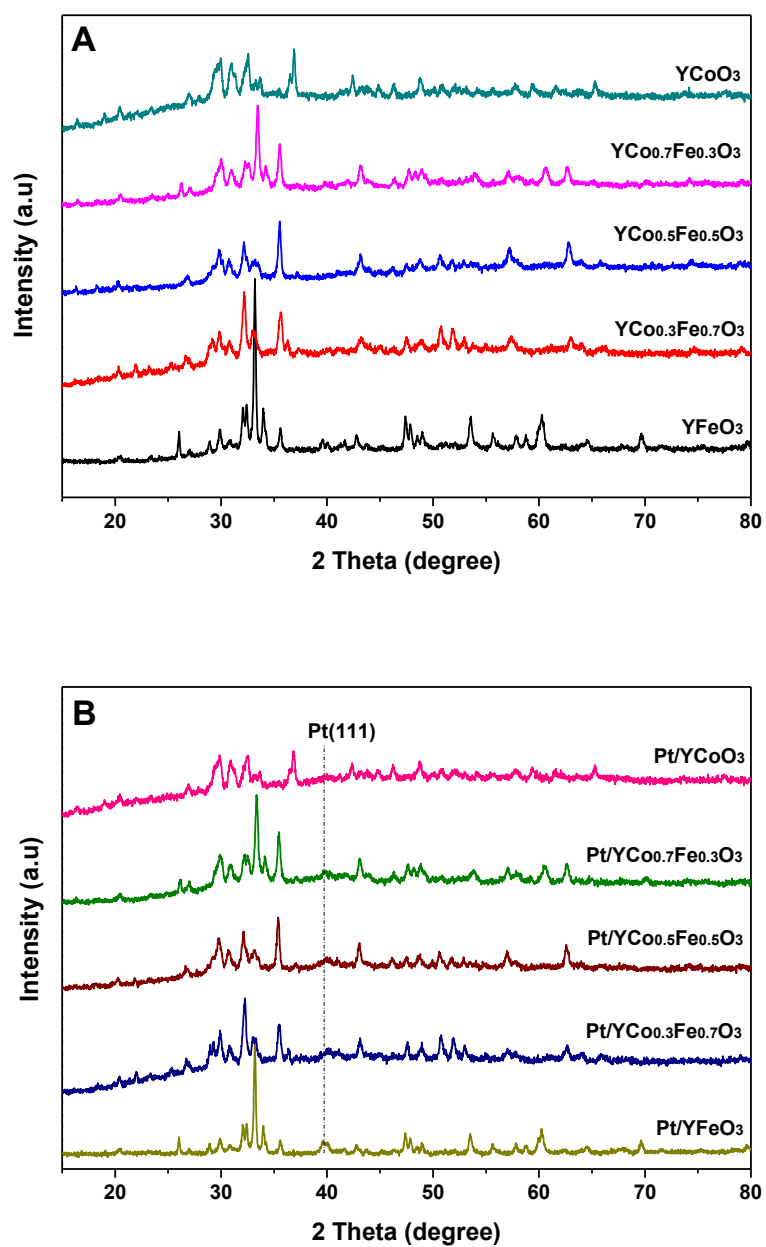

**Fig. S1.** Wide-angle XRD patterns of the Pt-based catalysts and YCo<sub>x</sub>Fe<sub>1-x</sub>O<sub>3</sub> supports.

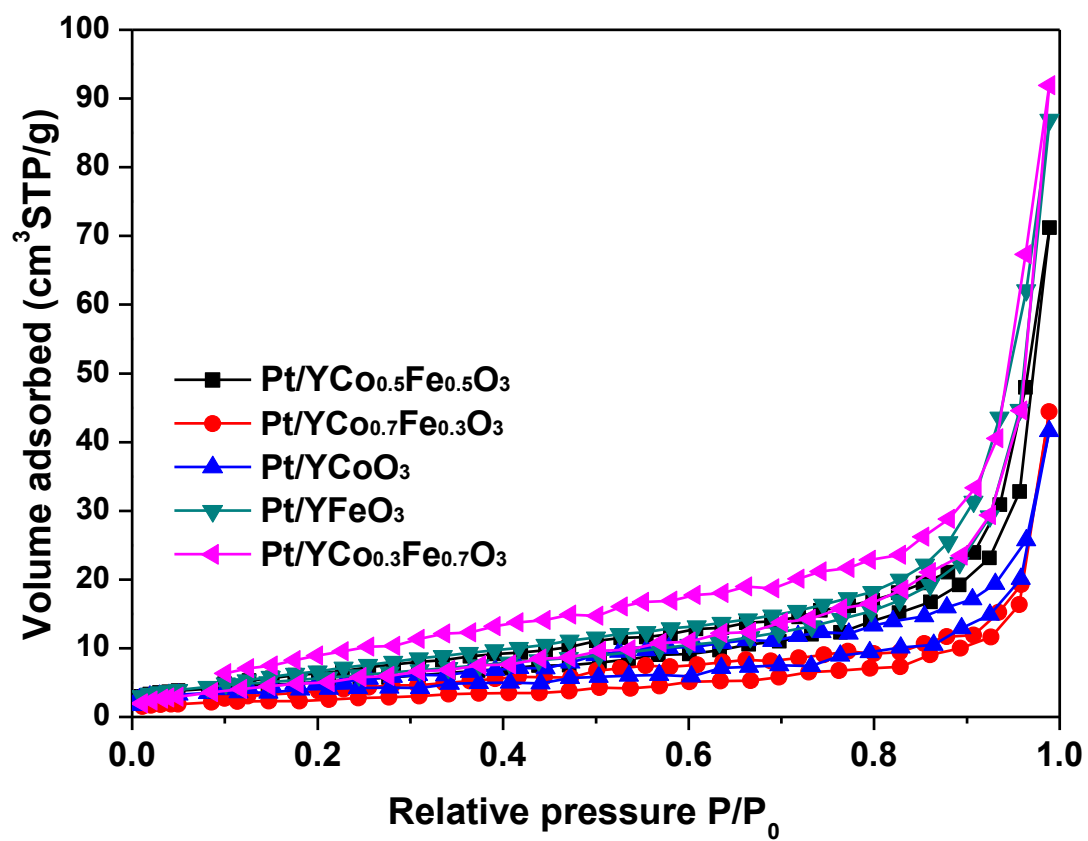

Fig. S2. N<sub>2</sub>-physorption isotherms of Pt/YCo<sub>x</sub>Fe<sub>1-x</sub>O<sub>3</sub> catalysts.

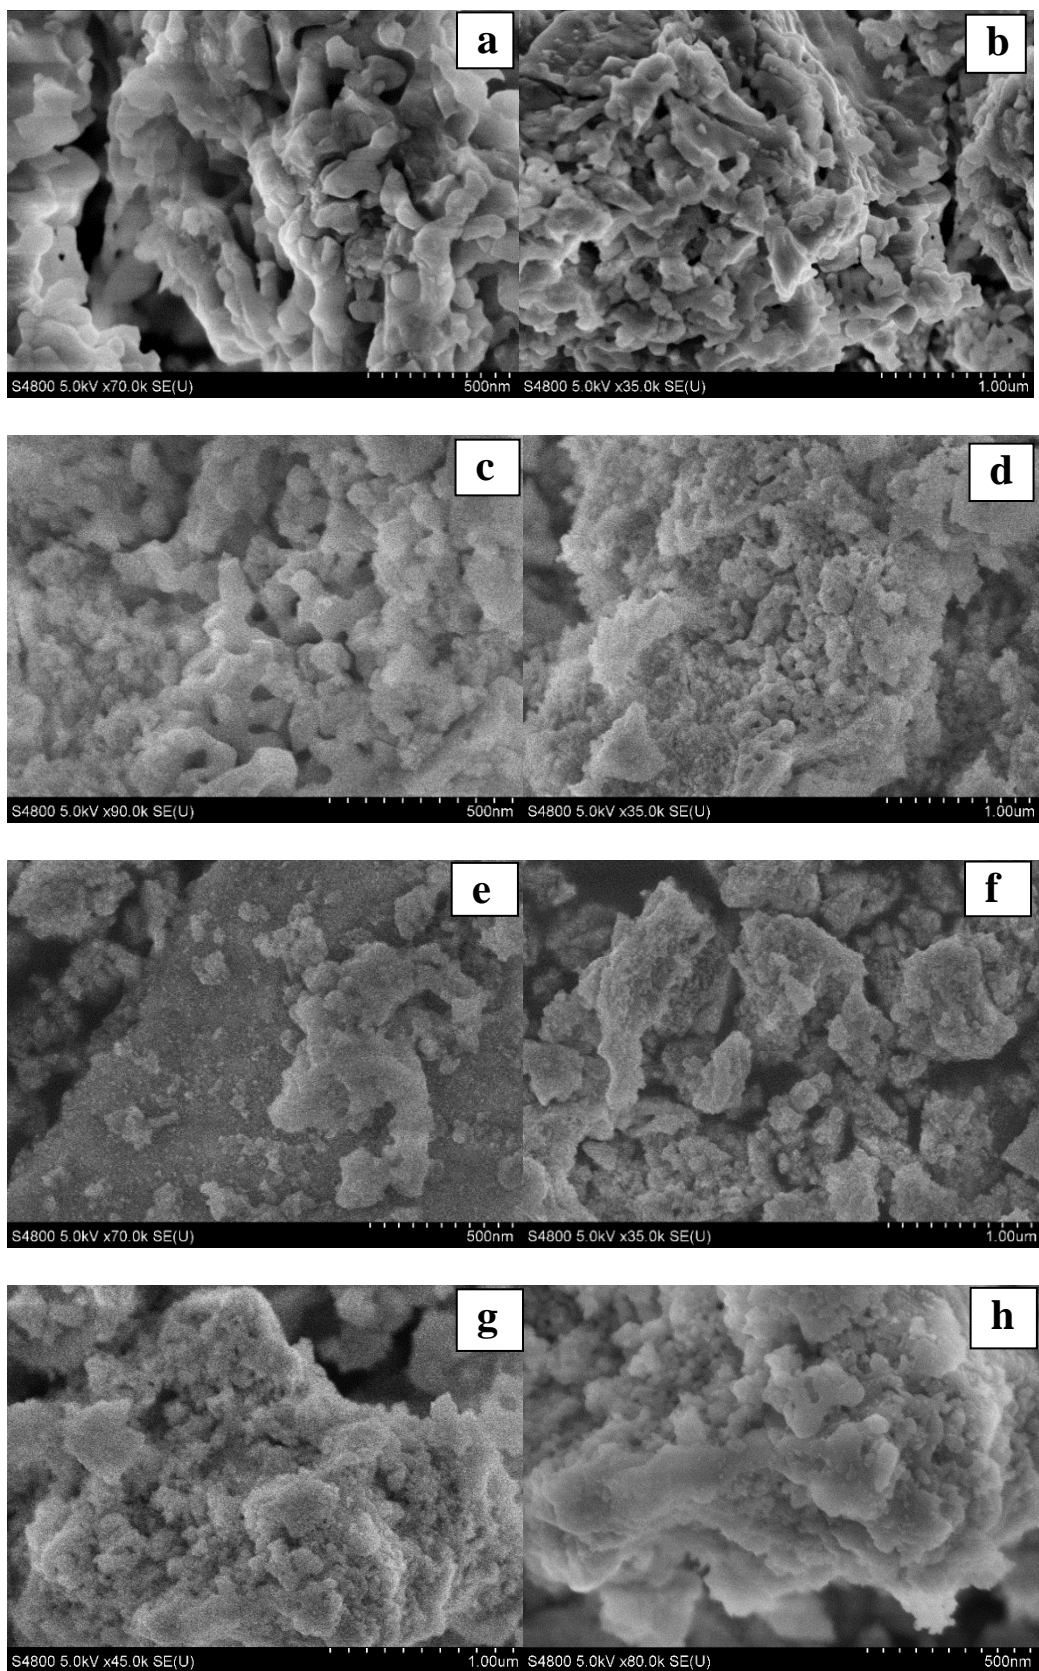

**Fig. S3.** SEM images of (a, b)  $\text{YCoO}_3$ ; (c, d)  $\text{YCo}_0.3\text{Fe}_0.7\text{O}_3$ ; (e, f)  $\text{Pt}/\text{YCo}_0.3\text{Fe}_0.7\text{O}_3$ -fresh and (g, h)  $\text{Pt}/\text{YCo}_0.3\text{Fe}_0.7\text{O}_3$ -used.



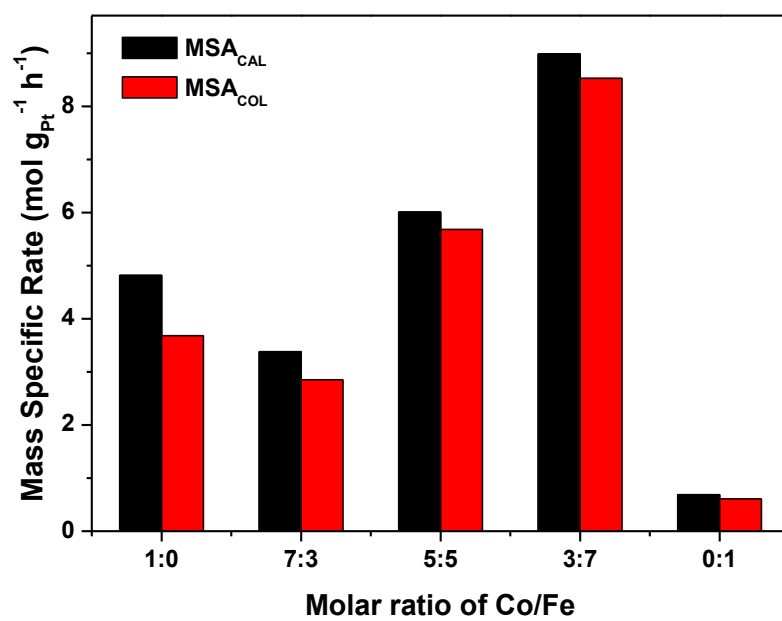

**Fig. S4.** The correlation of Mass Specific Rate versus the molar ratio of Co/Fe.

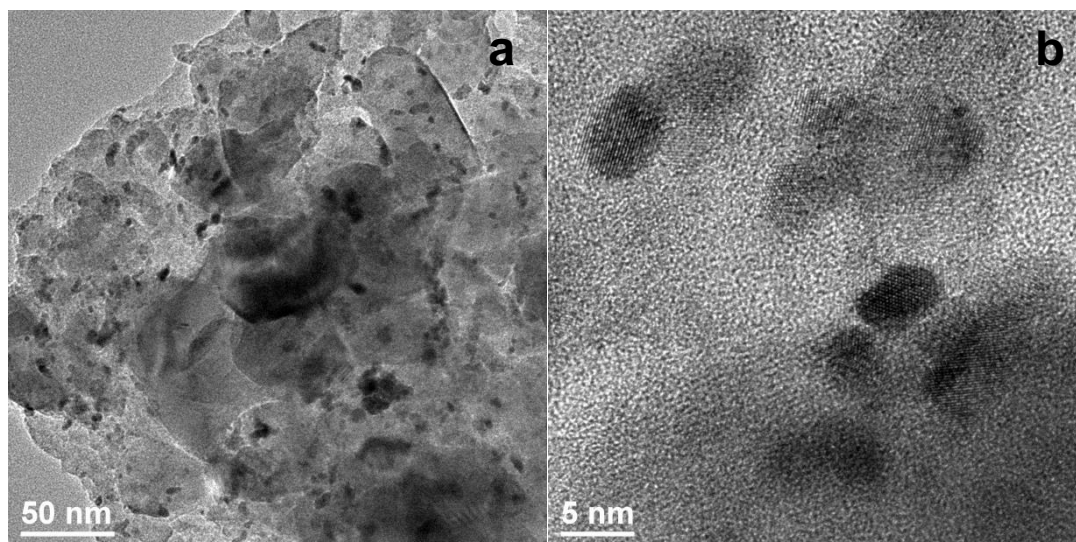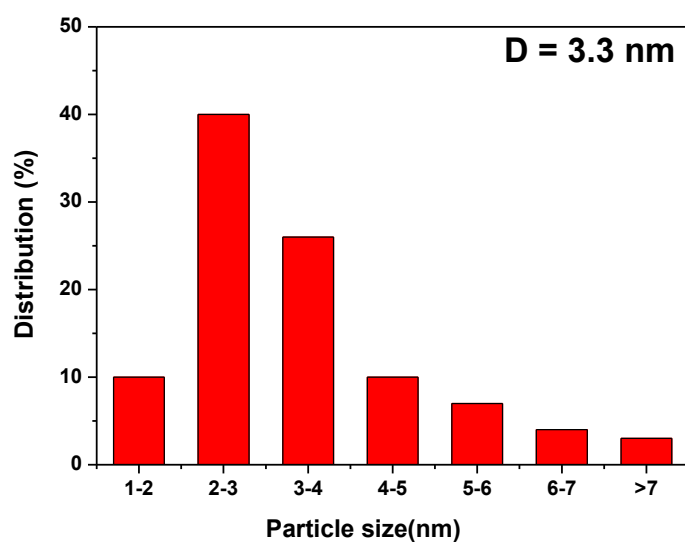

**Fig. S5.** TEM images and Pt particle size distribution of the used Pt/YCo<sub>0.3</sub>Fe<sub>0.7</sub>O<sub>3</sub> catalyst.

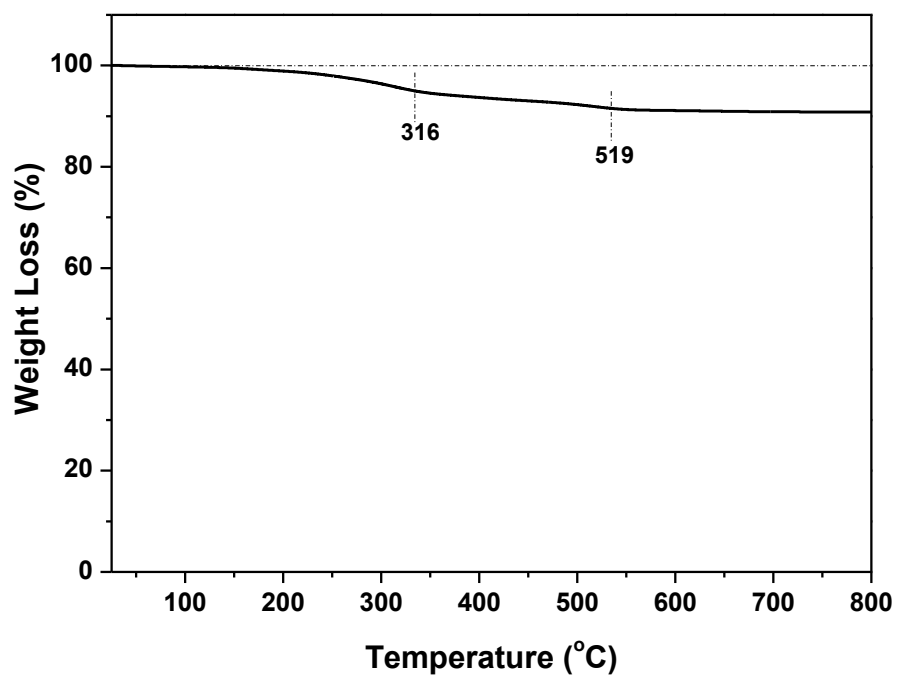

**Fig. S6.** TG curve of the used Pt/YCo<sub>0.3</sub>Fe<sub>0.7</sub>O<sub>3</sub> catalyst.

**Table S1.** Comparison of the Pt-based catalysts for the selective hydrogenation of CAL to yield COL.

| Catalyst                                               | T (°C) | P <sub>H<sub>2</sub></sub> (MPa) | t (h) | Conv. (%) | COL Sel. (%) | TOF (h <sup>-1</sup> ) | MSR <sup>a</sup> (mol/(g·h)) | Ref.       |
|--------------------------------------------------------|--------|----------------------------------|-------|-----------|--------------|------------------------|------------------------------|------------|
| Pt-1a/n-Al <sub>2</sub> O <sub>3</sub>                 | 30     | 1.0                              | 3     | 99.0      | 91.0         | 3746                   | -                            | 3          |
| PtFe <sub>0.25</sub> /15AS                             | 90     | 2.0                              | 1     | 77.4      | 76.9         | 5544                   | 13.9                         | 5          |
| PtFe <sub>0.25</sub> /15TS                             | 90     | 2.0                              | 0.5   | 68.0      | 86.4         | 11016                  | 12.2                         | 6          |
| Pt/SiC-C                                               | 25     | 2.0                              | 1     | 84.9      | 80.0         | 2446                   | -                            | 7          |
| Pt/TiO <sub>2</sub> -SiO <sub>2</sub>                  | 80     | 4.0                              | 0.5   | 98.8      | 91.0         | -                      | 3.9×10 <sup>-2</sup>         | 8          |
| Pt/CeZrO <sub>2</sub> -1.5                             | 60     | 1.0                              | 0.5   | 95.0      | 94.0         | 10423                  | -                            | 9          |
| Pt/3DHPC                                               | 70     | 2.0                              | 1     | 92.7      | 91.1         | 1554                   | -                            | 10         |
| Pt-Mo <sub>2</sub> N/SBA-15                            | 80     | 1.0                              | 2     | 70.8      | 76.9         | 521                    | -                            | 13         |
| PtFe NWs                                               | 70     | 0.1                              | 2.5   | 95.7      | 95.5         | 100                    | -                            | 14         |
| Pt <sub>3</sub> Fe/CNT                                 | 60     | 2.0                              | 0.5   | 62.1      | 97.2         | 1200                   | -                            | 15         |
| MIL-101@Pt@FeP-CMP <sup>sponge</sup>                   | RT     | 3.0                              | 0.25  | 97.6      | 97.3         | 1516                   | -                            | 19         |
| Pt/FeFe-LDH                                            | 110    | 1.0                              | 2     | 90.0      | 92.0         | 1026                   | -                            | 21         |
| Co-Pt/C-0.6                                            | 80     | 2.0                              | 2     | 100       | 99.0         | 15084                  | -                            | 24         |
| Pt/YCo <sub>0.3</sub> Fe <sub>0.7</sub> O <sub>3</sub> | 90     | 2.0                              | 0.5   | 98.9      | 94.9         | 15163                  | 31.1                         | This study |

<sup>a</sup>: MSR means mass-specific rate, defined as the converted CAL or formed COL per gram of Pt per hour

### References:

- [3] H. Liu, Q. Mei, S. Li, Y. Yang, Y. Wang, H. Liu, L. Zheng, P. An, J. Zhang, B. Han, *Chem. Commun.*, 2018, 54, 908.
- [5] H. Pan, J. Li, J. Lu, G. Wang, W. Xie, P. Wu, X. Li, *J. Catal.*, 2017, 354, 24-36.
- [6] Y. Xue, R. Yao, J. Li, G. Wang, P. Wu, X. Li, *Catal. Sci. Technol.*, 2017, 7, 6112-6123.
- [7] R. Yao, *RSC Adv.*, 2016, 6,
- [8] Q. Wu, C. Zhang, B. Zhang, X. Li, Z. Ying, T. Liu, W. Lin, Y. Yu, H. Cheng, F. Zhao, *J. Colloid Interf. Sci.*, 2016, 463, 75-82.
- [9] S. Wei, Y. Zhao, G. Fan, L. Yang, Li, F. Li, *Chem. Eng. J.*, 2017, 322, 234-245.
- [10] D. Hu, W. Fan, Z. Liu, L. Li, *ChemCatChem*, 2018, 10, 779-788.
- [13] D. Wang, Y. Zhu, C. Tian, L. Wang, W. Zhou, Y. Dong, Q. Han, Y. Liu, F. Yuan, H. Fu, *Catal. Sci. Technol.*, 2016, 6, 2403-2412.
- [14] S. Bai, L. Bu, Q. Shao, X. Zhu, X. Huang, *J. Am. Chem. Soc.*, 2018, 140, 8384-8387.
- [15] Y. Dai, X. Gao, X. Chu, C. Jiang, Y. Yao, Z. Guo, C. Zhou, C. Wang, H. Wang, Y. Yang, *J. Catal.*, 2018, 364, 192-203.
- [19] K. Yuan, T. Song, D. Wang, X. Zhang, X. Gao, Y. Zou, H. Dong, Z. Tang, W. Hu, *Angew. Chem. Int. Ed.*, 2018, 57, 5708-5713.
- [21] Y. Zhang, S. Wei, Y. Lin, G. Fan, F. Li, *ACS Omega*, 2018, 3, 12778-12787.
- [24] C. Li, C. Ke, R. Han, G. Fan, L. Yang, F. Li, *Mol. Catal.*, 2018, 455, 78-87.

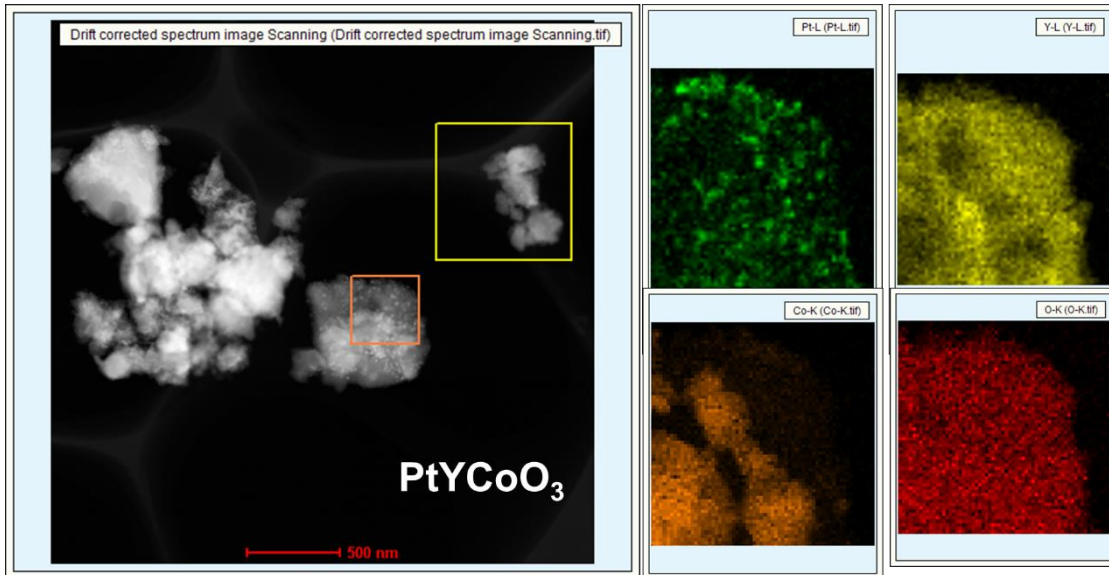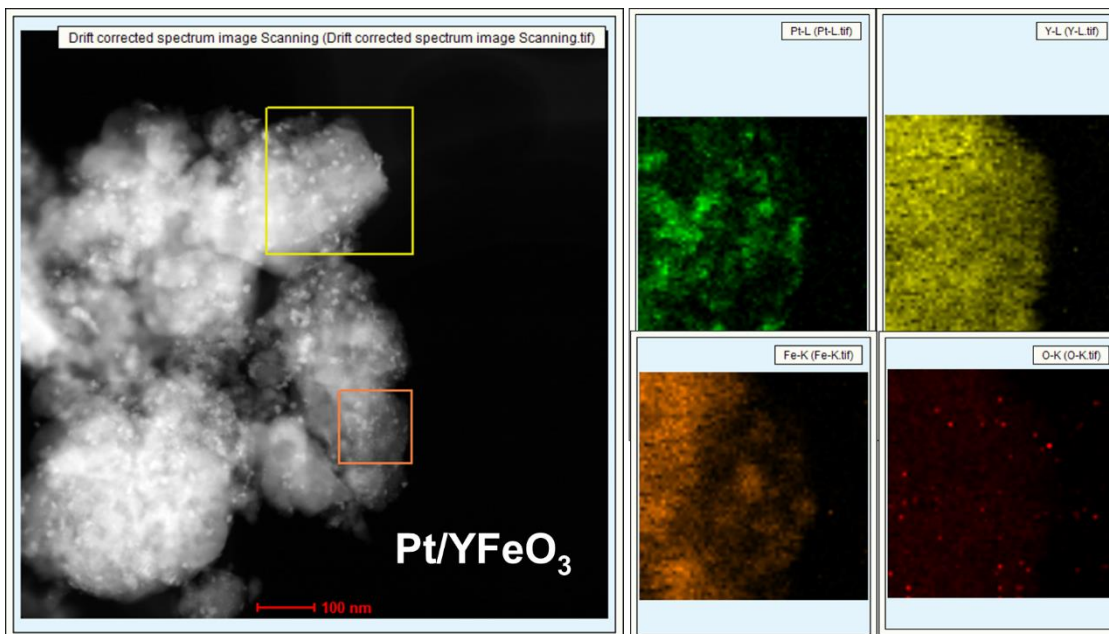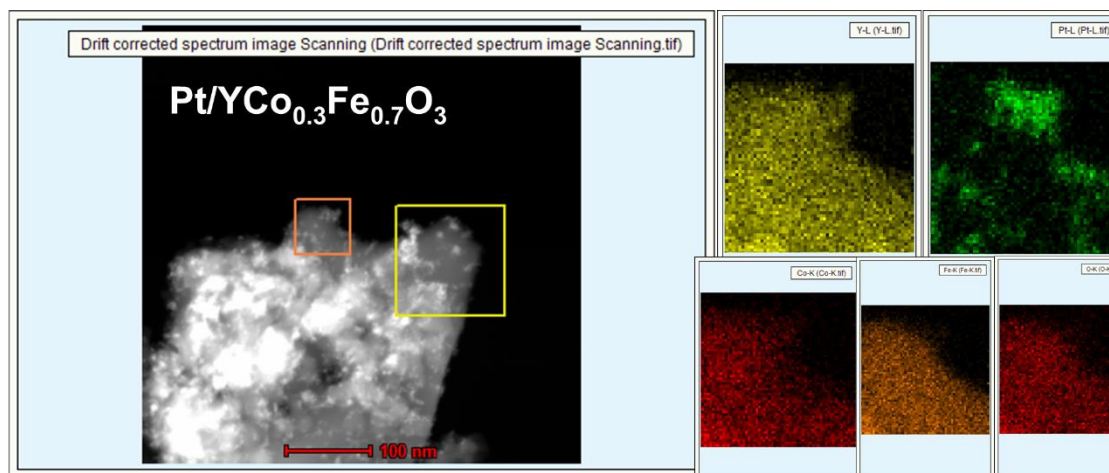

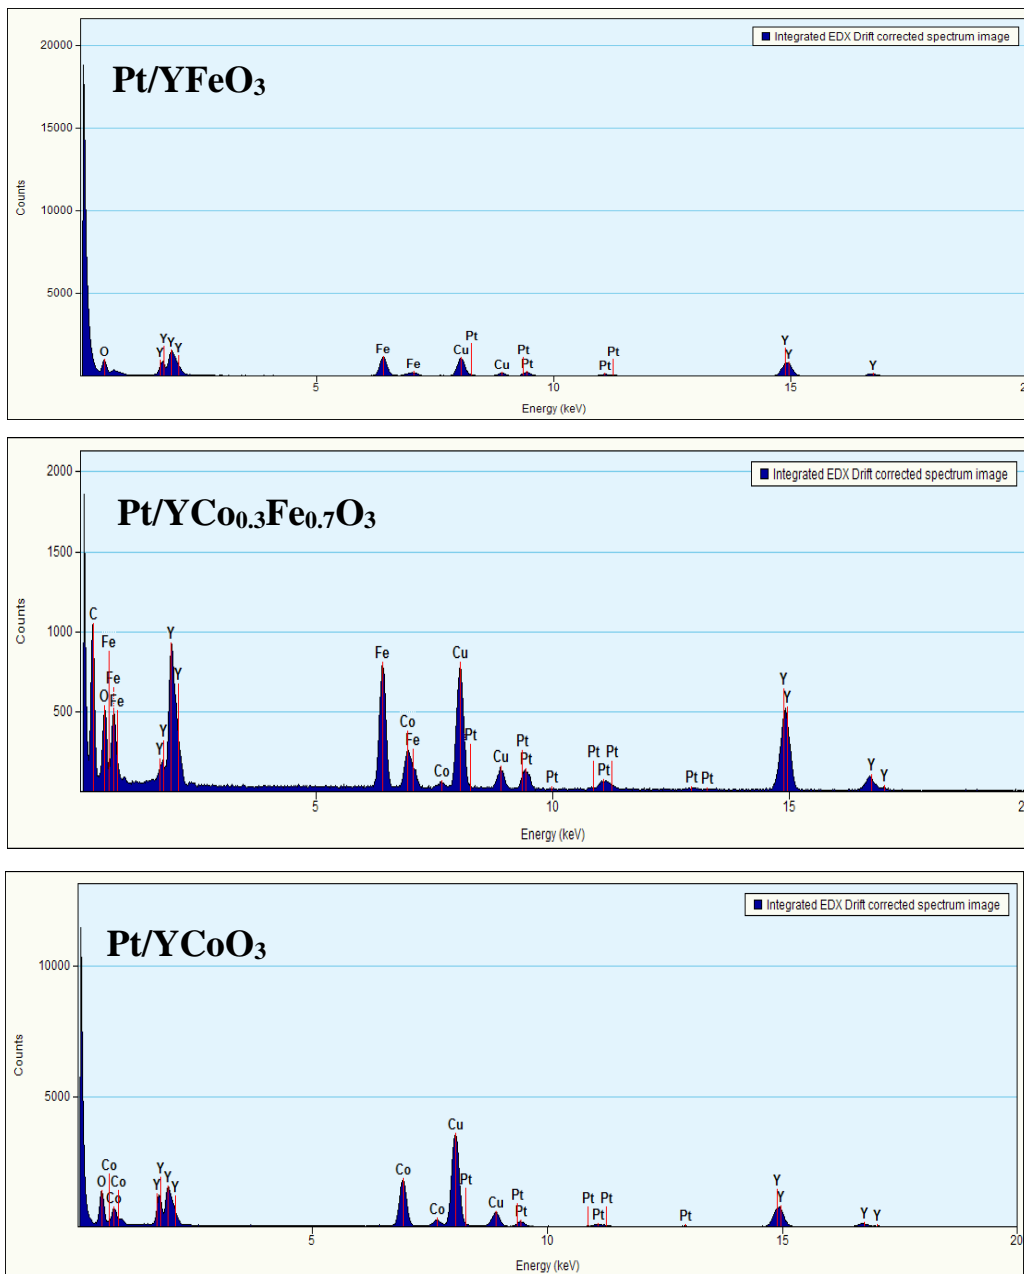

**Fig. S7.** HAADF-STEM images and STEM-EDS elemental mapping images for the area enclosed by the orange square for Pt/YCoO<sub>3</sub>; Pt/YFeO<sub>3</sub> and Pt/YCo<sub>0.3</sub>Fe<sub>0.7</sub>O<sub>3</sub>.

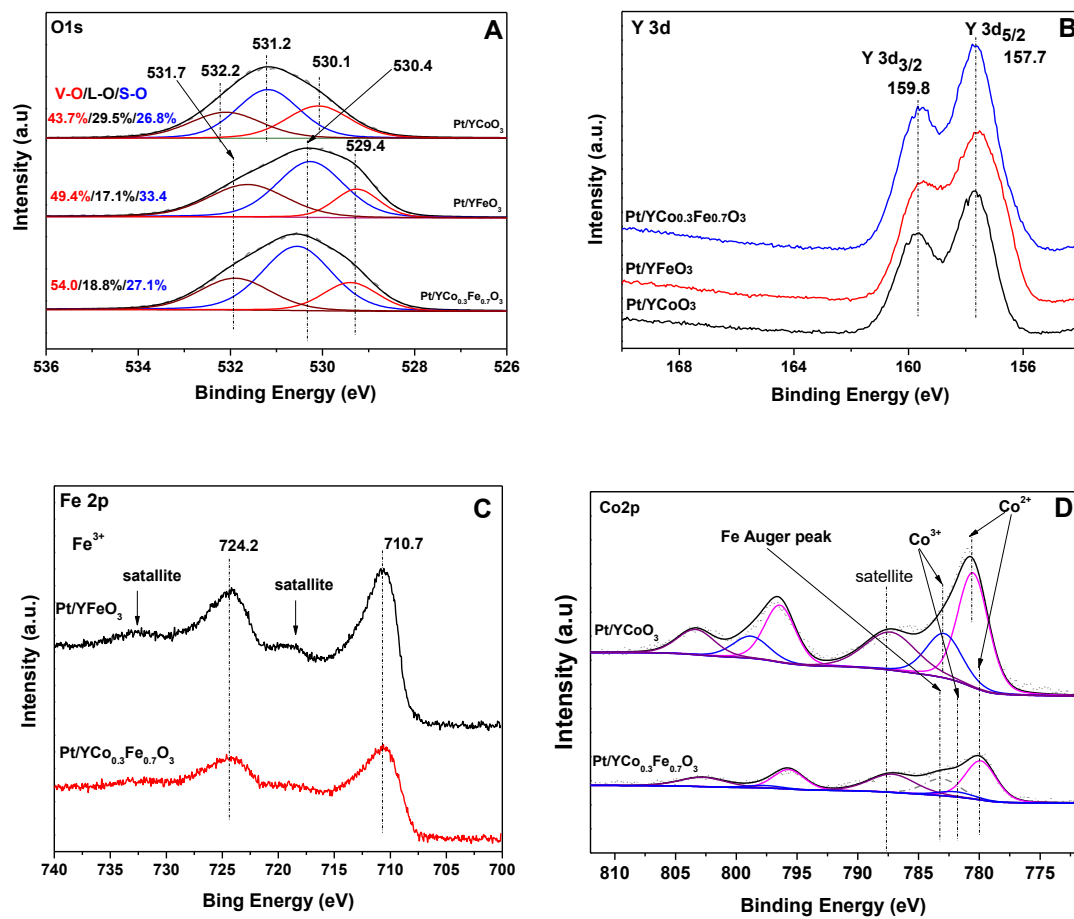

**Fig. S8.** XPS spectra of the Pt/YCo<sub>x</sub>Fe<sub>1-x</sub>O<sub>3</sub> catalyst

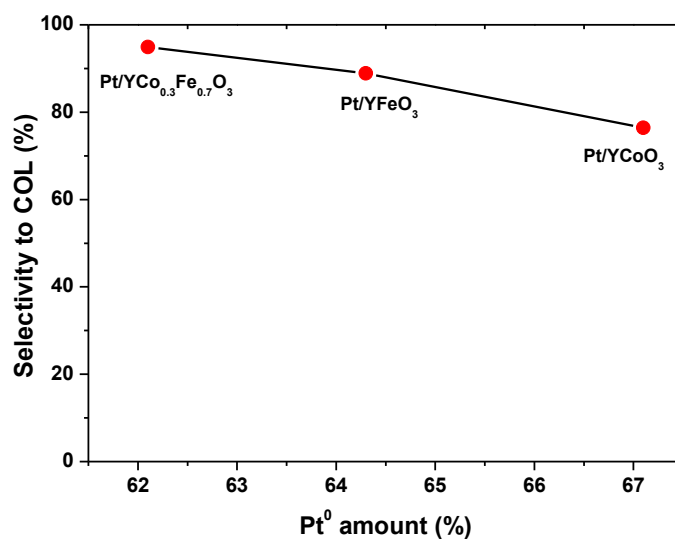

**Fig. S9.** The correlation of COL selectivity versus Pt<sup>0</sup> amount on the Pt/YCo<sub>x</sub>Fe<sub>1-x</sub>O<sub>3</sub> catalyst according to XPS results.
